# Supplementary material for: A Hypertension-Associated tRNAAla Mutation Alters tRNA Metabolism and Mitochondrial Function
Source: PubMed Central journal article supplement (PMC4936059; doi:10.1128/mcb.00199-16), 2016-06-29
Supplement: MCB.00199-16_zmb999101258so1.pdf [file MCB.00199-16_zmb999101258so1.pdf]

Table S1. mtDNA variants in three Han Chinese probands with hypertension and one control subject (C1)

| Gene   | Position | Replacement | Conservation       |                        | CRS | WHP20-II-13 | WHP21-II-3 | WHP22-II-5 | C1 | Previously reported <sup>b</sup> |
|--------|----------|-------------|--------------------|------------------------|-----|-------------|------------|------------|----|----------------------------------|
|        |          |             | Index <sup>a</sup> | Frequency <sup>b</sup> |     |             |            |            |    |                                  |
|        |          |             | (17 species)       |                        |     |             |            |            |    |                                  |
| D-loop | 73       | A to G      |                    |                        | A   | G           | G          | G          | G  | Yes                              |
|        | 150      | C to T      |                    |                        | C   |             |            |            | T  | Yes                              |
|        | 152      | T to C      |                    |                        | T   |             | C          |            |    | Yes                              |
|        | 195      | T to C      |                    |                        | T   | G           |            |            |    | Yes                              |
|        | 263      | A to G      |                    |                        | A   | G           | G          | G          | G  | Yes                              |
|        | 298      | C to T      |                    |                        | C   |             | T          | T          |    | Yes                              |
|        | 310      | T to TC/TCC |                    |                        | T   | TC          | TCC        | TCC        | TC | Yes                              |
|        | 316      | T to TC     |                    |                        | T   | TC          | TC         | TC         |    | Yes                              |
|        | 489      | T to C      |                    |                        | T   |             | C          | C          |    | Yes                              |
|        | 16093    | T to C      |                    |                        | T   | C           |            |            |    | Yes                              |
|        | 16136    | T to C      |                    |                        | T   |             |            |            | C  | Yes                              |
|        | 16140    | T to C      |                    |                        | T   |             |            |            | C  | Yes                              |
|        | 16150    | C to T      |                    |                        | C   | T           |            |            |    | Yes                              |
|        | 16169    | C to T      |                    |                        | C   |             | T          | T          |    | Yes                              |
|        | 16182    | A to C      |                    |                        | A   | C           |            |            |    | Yes                              |
|        | 16183    | A to C      |                    |                        | A   | C           |            |            | C  | Yes                              |
|        | 16189    | T to C      |                    |                        | T   | C           |            |            | C  | Yes                              |
|        | 16193    | C to CC     |                    |                        | C   |             |            |            | CC | Yes                              |
|        | 16217    | T to C      |                    |                        | T   | C           |            |            | C  | Yes                              |
|        | 16223    | C to T      |                    |                        | C   |             | T          | T          |    | Yes                              |
|        | 16240    | A to G      |                    |                        | A   | G           |            |            |    | Yes                              |

|                     |       |                   |       |           |   |   |   |   |   |     |
|---------------------|-------|-------------------|-------|-----------|---|---|---|---|---|-----|
|                     | 16249 | T to C            |       |           | T |   |   |   | C | Yes |
|                     | 16261 | C to T            |       |           | C | T |   |   |   | Yes |
|                     | 16274 | G to A            |       |           | G |   | A | A | A | Yes |
|                     | 16280 | A to G            |       |           | A |   |   |   | G | Yes |
|                     | 16291 | C to T            |       |           | C |   |   |   | T | Yes |
|                     | 16311 | T to C            |       |           | T |   | C | C |   | Yes |
|                     | 16362 | T to C            |       |           | T |   | C | C |   | Yes |
|                     | 16407 | C to T            |       |           | C | C |   |   |   | Yes |
|                     | 16519 | T to C            |       |           | T |   |   |   | C | Yes |
| 12S                 |       |                   |       |           |   |   |   |   | A |     |
| rRNA                | 709   | G to A            | 10/17 | 444/2704  | G |   |   |   |   | Yes |
|                     | 750   | A to G            | 17/17 | 2682/2704 | A | G | G | G | G | Yes |
|                     | 1119  | T to C            | 9/17  | 26/2704   | T |   |   |   | C | Yes |
|                     | 1438  | A to G            | 16/17 | 2620/2704 | A | G | G | G | G | Yes |
|                     | 1556  | C to T            | 4/17  | 0/2704    | C | T |   |   |   | Yes |
| 16S                 |       |                   |       |           |   |   |   |   |   |     |
| rRNA                | 1842  | A to G            | 3/17  | 5/2704    | A | G |   |   |   | Yes |
|                     | 2483  | T to C            | 6/17  | 7/2704    | T |   |   |   | C | Yes |
|                     | 2706  | A to G            | 15/17 | 2178/2704 | A | G |   |   | G | Yes |
|                     | 3010  | G to A            | 6/17  | 550/2704  | G |   | A | A |   | Yes |
| <i>ND1</i>          | 3435  | C to T            |       |           | C |   |   |   | T | No  |
|                     | 3497  | C to T (Ala64Val) | 3/17  | 22/2704   | C |   |   |   | T | Yes |
|                     | 3571  | C to T (Leu89Phe) | 16/17 | 2/2704    | C |   |   |   | T | No  |
|                     | 4140  | C to T            |       |           | C |   | T | T |   | No  |
| tRNA <sup>Gln</sup> | 4394  | C to T            | 9/17  | 3/2704    | C |   |   |   | T | Yes |
| <i>ND2</i>          | 4769  | A to G            |       |           | A |   | G | G |   | Yes |

|                           |             |                     |       |           |          |          |          |          |     |
|---------------------------|-------------|---------------------|-------|-----------|----------|----------|----------|----------|-----|
|                           | 4883        | C to T              |       |           | C        |          | T        | T        | Yes |
|                           | 5178        | C to T (Leu237Met)  | 8/17  | 1/2704    | C        |          | A        | A        | Yes |
| <b>tRNA<sup>Ala</sup></b> | <b>5655</b> | T to C              | 10/17 | 23/2704   | <b>T</b> | <b>C</b> | <b>C</b> | <b>C</b> | Yes |
| <i>COXI</i>               | 6286        | T to C (Val128Ala ) | 17/17 | 1/2704    | T        | C        |          |          | Yes |
|                           | 6863        | A to G              |       |           | A        | G        |          |          | Yes |
|                           | 7028        | C to T              |       |           | C        | T        | T        | T        | Yes |
| <i>NC7</i>                | 8281-8289   | 9bp del             |       |           | C        | 9bp del  |          | 9 bp del | Yes |
| <i>ATP8</i>               | 8414        | C to T (Leu17Phe)   | 10/17 | 264/2704  | C        |          | T        | T        | Yes |
|                           | 8519        | G to A (Glu52Lys)   | 12/17 | 1/2704    | G        |          | A        | A        | Yes |
| <i>ATP6</i>               | 8701        | A to G (Thr59Ala )  | 9/17  | 933/2704  | A        |          | G        | G        | Yes |
|                           | 8860        | A to G (Thr112Ala ) | 12/17 | 2698/2704 | A        | G        |          | G        | Yes |
| <i>ATP6</i>               | 9128        | T to C (Ile201Thr)  |       | 6/2704    | T        |          |          | C        | Yes |
| <i>CO3</i>                | 9368        | A to G              |       |           | A        |          | G        | C        | Yes |
|                           | 9540        | T to C              |       |           | T        |          | C        | C        | Yes |
|                           | 9575        | G to A              |       |           | G        |          |          | A        | Yes |
| <i>ND3</i>                | 10398       | A to G (Thr114Ala ) | 7/17  | 1242/2704 | A        | G        | G        | G        | Yes |
|                           | 10400       | C to T (Thr114Ala ) | 7/17  | 724/2704  | C        |          | T        | T        | Yes |
| <i>ND4L</i>               | 10493       | T to C              |       |           | T        |          |          | C        | No  |
|                           | 10873       | T to C              |       |           | T        |          | C        | C        | Yes |
|                           | 11059       | C to T              |       |           | C        |          | T        | T        | Yes |
| <i>ND4</i>                | 11440       | G to A              |       |           | G        |          |          | A        | Yes |
|                           | 11719       | G to A              |       |           | G        | A        | A        | A        | Yes |
| <i>ND5</i>                | 12372       | G to A              |       |           | G        |          | A        | A        | Yes |
|                           | 12705       | C to T              |       |           | C        |          | T        | T        | Yes |
|                           | 13104       | A to G              |       |           | A        |          | G        | G        | Yes |
|                           | 13135       | G to A (Ala267Ile ) | 4/17  | 18/2704   | G        | A        |          |          | Yes |

|                     |       |                     |       |           |   |   |   |   |   |     |
|---------------------|-------|---------------------|-------|-----------|---|---|---|---|---|-----|
| ND6                 | 14410 | G to A              |       |           | G | A |   |   |   | Yes |
|                     | 14668 | C to T              |       |           | C |   | T | T |   | Yes |
| Cytb                | 14766 | C to T (Thr7Ile )   | 8/17  | 610/2704  | C | T |   | T | T | Yes |
|                     | 14783 | T to C              |       |           | T |   | C | C |   | Yes |
|                     | 15043 | G to A              |       |           | G |   | A | A |   | Yes |
|                     | 15085 | A to G              |       |           | A |   | G | G |   | Yes |
|                     | 15301 | G to A              |       |           | G |   | A | A |   | Yes |
| tRNA <sup>Thr</sup> | 15326 | A to G (Thr194Ala ) | 9/17  | 2687/2704 | A | G | G | G | G | Yes |
|                     | 15924 | T to C              | 14/17 | 106/2704  | T |   |   | C |   | Yes |

CRS, consensus Cambridge sequence (Andrews et al., 1999)

<sup>a</sup> Conservation index (CI) was calculated by comparing the human mtDNA variants with other 16 vertebrates: *Bos Taurus*, *Cebus albifrons*, *Gorilla gorilla*, *Hylobates lar*, *Lemur catta*, *Macaca mulatta*, *Macaca sylvanus*, *Mus musculus*, *Nycticebus coucang*, *Pan paniscus*, *Pan troglodytes*, *Pongo pygmaeus*, *Pongo abelii*, *Papio hamadryas*, *Tarsius bancanus*, and *Xenopus laevis*.

<sup>b</sup> See the online mitochondrial genome database <http://www.mitomap.org/MITOMAP> and <http://www.mtodb.igp.uu.se/>.

**Table S2.** Summary of Clinical Data for Some Members in three Chinese Pedigree

| Subjects     | Gender | Age of test (yrs) | Age of onset (yrs) | Diastolic pressure (mmHg) | Diastolic pressure (mmHg) |
|--------------|--------|-------------------|--------------------|---------------------------|---------------------------|
| WHP20-I-2    | F      | 94                | 80                 | 180                       | 90                        |
| WHP20-II-2   | F      | 73                | 50                 | 160                       | 90                        |
| WHP20-II-3   | M      | 69                | 64                 | 170                       | 80                        |
| WHP20-II-5   | M      | 66                | 60                 | 140                       | 100                       |
| WHP20-II-6   | F      | 62                | 48                 | 150                       | 110                       |
| WHP20-II-7   | M      | 63                | 62                 | 142                       | 90                        |
| WHP20-II-9   | M      | 60                | 55                 | 160                       | 110                       |
| WHP20-II-12  | F      | 57                | 56                 | 140                       | 110                       |
| WHP20-II-13  | M      | 55                | 50                 | 210                       | 130                       |
| WHP20-II-12  | M      | 56                | 53                 | 155                       | 95                        |
| WHP20-III-1  | M      | 55                | 40                 | 180                       | 110                       |
| WHP20-III-2  | F      | 45                | 46                 | 145                       | 85                        |
| WHP20-III-3  | M      | 52                | 52                 | 140                       | 90                        |
| WHP20-III-4  | F      | 52                | 49                 | 180                       | 110                       |
| WHP20-III-6  | F      | 48                | 42                 | 170                       | 110                       |
| WHP20-III-8  | F      | 45                | 44                 | 170                       | 110                       |
| WHP20-III-20 | M      | 40                | -                  | 110                       | 70                        |
| WHP20-III-21 | M      | 34                | -                  | 118                       | 76                        |
| WHP20-IV-2   | M      | 39                | 38                 | 145                       | 90                        |

---

|             |   |    |    |     |     |
|-------------|---|----|----|-----|-----|
| WHP20-IV-3  | F | 35 | -  | 110 | 75  |
| WHP20-IV-4  | F | 33 | -  | 110 | 72  |
| WHP20-IV-5  | M | 31 | -  | 105 | 76  |
| WHP20-IIV-6 | F | 28 | -  | 114 | 70  |
| WHP20-IIV-7 | M | 26 | -  | 110 | 75  |
| WHP21-I-2   | F | 75 | -  | 135 | 78  |
| WHP21-II-1  | M | 56 | -  | 130 | 83  |
| WHP21-II-3  | F | 55 | 55 | 145 | 98  |
| WHP21-II-3  | M | 54 | 52 | 150 | 95  |
| WHP21-II-8  | F | 48 | -  | 125 | 79  |
| WHP21-III-3 | M | 45 | 44 | 148 | 95  |
| WHP21-III-4 | M | 44 | -  | 120 | 75  |
| WHP21-III-6 | F | 28 | -  | 115 | 76  |
| WHP21-III-7 | F | 26 | -  | 112 | 70  |
| WHP22-I-2   | F | 89 | 69 | 153 | 90  |
| WHP22-II-1  | F | 69 | 64 | 165 | 110 |
| WHP22-II-3  | F | 67 | 62 | 170 | 105 |
| WHP22-II-5  | F | 65 | 60 | 158 | 101 |
| WHP22-II-7  | F | 64 | -  | 135 | 79  |
| WHP22-II-9  | M | 63 | 59 | 156 | 115 |
| WHP22-III-1 | M | 52 | 52 | 152 | 101 |
| WHP22-III-2 | M | 51 | -  | 135 | 79  |

---

---

|              |   |    |    |     |     |
|--------------|---|----|----|-----|-----|
| WHP22-III-3  | M | 50 | 50 | 146 | 110 |
| WHP22-III-4  | F | 49 | -  | 138 | 84  |
| WHP22-III-5  | F | 50 | 49 | 140 | 95  |
| WHP22-III-6  | F | 48 | -  | 138 | 82  |
| WHP22-III-7  | M | 46 | -  | 136 | 85  |
| WHP22-III-8  | F | 48 | -  | 130 | 79  |
| WHP22-III-9  | M | 45 | 44 | 149 | 98  |
| WHP22-III-10 | M | 44 | -  | 130 | 76  |
| WHP22-III-11 | F | 40 | -  | 136 | 86  |

---

These patients had antihypertension treatment. This table shows pre-treatment blood pressures.
